# Supplementary material
Source: Elsevier journal article supplement (https://github.com/j-andrews7/VENUSAR/files/503496/mmc1.pdf)
Supplement: mmc1 [file mmc1.pdf]

**Cell, Volume 166**

**Supplemental Information**

**The Genetics of Transcription Factor**

**DNA Binding Variation**

**Bart Deplancke, Daniel Alpern, and Vincent Gardeux**

**Table S1. Comparison of Computational Methods for Assessing the Impact of Regulatory Variants Based on DNA Sequence**

| Method              | Type             | Input            | Statistical assessment | Software                                  | Motif catalog                                                    | Reference                    |
|---------------------|------------------|------------------|------------------------|-------------------------------------------|------------------------------------------------------------------|------------------------------|
| RAVEN               | PWM              | Gene, SNV, indel | N                      | <a href="#">Web</a>                       | JASPAR                                                           | (Andersen et al., 2008)      |
| sTRAP               | PWM              | SNV, indel       | Y                      | <a href="#">Web</a>                       | JASPAR, TRANSFAC                                                 | (Manke et al., 2010)         |
| is-rSNP / is-rINDEL | PWM              | SNV, indel       | Y                      | <a href="#">Web</a> / <a href="#">Web</a> | JASPAR, TRANSFAC                                                 | (Macintyre et al., 2010)     |
| rSNP-MAPPER         | HMM              | Gene, SNV        | N                      | <a href="#">Web</a>                       | MAPPER, TRANSFAC, JASPAR                                         | (Riva, 2012)                 |
| regSNPs             | PWM <sup>1</sup> | SNP              | Y                      | <a href="#">R package</a>                 | TRANSFAC                                                         | (Teng et al., 2012)          |
| PMCA                | PWM <sup>2</sup> | SNP              | Y                      | NA                                        | Genomatix                                                        | (Claussnitzer et al., 2014)  |
| motifbreakR         | PWM              | SNV              | Y                      | <a href="#">R package</a>                 | MotifDb package, user-defined                                    | (Coetzee et al., 2015)       |
| BayesPI-BAR         | PWM <sup>3</sup> | SNV, indel       | Y                      | <a href="#">Batch</a>                     | ENCODE, user-defined                                             | (Wang and Batmanov, 2015)    |
| atSNP               | PWM              | SNV              | Y                      | <a href="#">R package</a>                 | ENCODE, JASPAR, user-defined                                     | (Zuo et al., 2015)           |
| deltaSVM            | SVM              | SNV, indel       | N                      | <a href="#">Batch</a>                     | No Motif. k-mer vocabulary from ENCODE DNaseI-seq, ChIP-seq      | (Lee et al., 2015)           |
| GERV                | PR <sup>4</sup>  | SNV, indel       | N                      | <a href="#">Batch</a>                     | No Motif. k-mer vocabulary from ENCODE DNaseI-seq, ChIP-seq      | (Zeng et al., 2015)          |
| DeepBind            | NN               | SNV, indel       | N                      | <a href="#">Batch</a>                     | built from PBM, SELEX, ChIP-seq, CLIP-seq                        | (Alipanahi et al., 2015)     |
| DeepSea             | NN               | SNV, indel       | Y                      | <a href="#">Web</a>                       | No Motif. ENCODE & Roadmap Epigenomics (TF, DHS, chromatin mark) | (Zhou and Troyanskaya, 2015) |
| HaploReg            | PWM              | SNP, indel       | N                      | <a href="#">Web</a>                       | TRANSFAC, JASPAR, built from PBM                                 | (Ward and Kellis, 2016)      |

PWM: Position Weight Matrix; SNP: Single Nucleotide Polymorphism; SNV: Single Nucleotide Variation; indel: insertion and deletion; TF: Transcription Factor; DHS: DNase I Hypersensitivity Site; NA: Not Available; [Machine Learning Approaches]: PR: Poisson Regression; HMM: Hidden Markov Model; NN: Neural Network; SVM: Support Vector Machine;

<sup>1</sup>PWM differential score is then mixed with a gene prioritization score based on pathway analysis

<sup>2</sup>PWMs are used for identifying conserved TFBS across species. Sequence context of SNPs are scored based on conservation of TFBS modules

<sup>3</sup>Differential Binding Affinity score ( $\delta dbA$ ) also incorporates protein concentration and chemical properties from ChIP-seq data

<sup>4</sup>Regression predicts the ChIP-seq signal at every nucleotide position, then scoring is computed as the difference between predicted peaks

## References

- Alipanahi, B., Delong, A., Weirauch, M.T., and Frey, B.J. (2015). Predicting the sequence specificities of DNA- and RNA-binding proteins by deep learning. *Nat Biotech* 33, 831-838.
- Andersen, M.C., Engstrom, P.G., Lithwick, S., Arenillas, D., Eriksson, P., Lenhard, B., Wasserman, W.W., and Odeberg, J. (2008). In silico detection of sequence variations modifying transcriptional regulation. *PLoS Comput Biol* 4, e5.
- Claussnitzer, M., Dankel, Simon N., Klocke, B., Grallert, H., Glunk, V., Berulava, T., Lee, H., Oskolkov, N., Fadista, J., Ehlers, K., *et al.* (2014). Leveraging Cross-Species Transcription Factor Binding Site Patterns: From Diabetes Risk Loci to Disease Mechanisms. *Cell* 156, 343-358.
- Coetzee, S.G., Coetzee, G.A., and Hazelett, D.J. (2015). motifbreakR: an R/Bioconductor package for predicting variant effects at transcription factor binding sites. *Bioinformatics* 31, 3847-3849.
- Lee, D., Gorkin, D.U., Baker, M., Strober, B.J., Asoni, A.L., McCallion, A.S., and Beer, M.A. (2015). A method to predict the impact of regulatory variants from DNA sequence. *Nat Genet* *advance online publication*.
- Macintyre, G., Bailey, J., Haviv, I., and Kowalczyk, A. (2010). is-rSNP: a novel technique for in silico regulatory SNP detection. *Bioinformatics* 26, i524-530.
- Manke, T., Heinig, M., and Vingron, M. (2010). Quantifying the effect of sequence variation on regulatory interactions. *Hum Mutat* 31, 477-483.
- Riva, A. (2012). Large-scale computational identification of regulatory SNPs with rSNP-MAPPER. *BMC genomics* 13 Suppl 4, S7.
- Teng, M., Ichikawa, S., Padgett, L.R., Wang, Y., Mort, M., Cooper, D.N., Koller, D.L., Foroud, T., Edenberg, H.J., Econs, M.J., *et al.* (2012). regSNPs: a strategy for prioritizing regulatory single nucleotide substitutions. *Bioinformatics* 28, 1879-1886.
- Wang, J., and Batmanov, K. (2015). BayesPI-BAR: a new biophysical model for characterization of regulatory sequence variations. *Nucleic Acids Research*.
- Ward, L.D., and Kellis, M. (2016). HaploReg v4: systematic mining of putative causal variants, cell types, regulators and target genes for human complex traits and disease. *Nucleic Acids Res* 44, D877-881.
- Zeng, H., Hashimoto, T., Kang, D.D., and Gifford, D.K. (2015). GERV: a statistical method for generative evaluation of regulatory variants for transcription factor binding. *Bioinformatics*.
- Zhou, J., and Troyanskaya, O.G. (2015). Predicting effects of noncoding variants with deep learning-based sequence model. *Nat Meth* 12, 931-934.
- Zuo, C., Shin, S., and Keles, S. (2015). atSNP: transcription factor binding affinity testing for regulatory SNP detection. *Bioinformatics* 31, 3353-3355
